# Supplementary material for: External quality assessment for molecular detection of sand fly-borne phleboviruses circulating in the Mediterranean Basin
Source: Springer Nature journal article supplement (doi:10.1186/s13071-025-06785-0), 2025-05-12
Supplement: MOESM1 [file 13071_2025_6785_MOESM1_ESM.pdf]

---

## STANDARD OPERATING PROCEDURE

---

### Phlebovirus External Quality Assessment (EQA) Protocol

N° SOP

SOP CLIMOS# 3.1

---

Date

Version

---

Elaborated byNazli Ayhan, Remi Charrel, Gioia  
Bongiorno

---

Approved by

Carla Maia

## PURPOSE

The purpose of this Standard Operating Procedure (SOP) is to describe the protocol used for External Quality Assessment (EQA)

## INTRODUCTION

The term external quality assessment (EQA) is used to describe a method that allows comparison of a laboratory's testing to an external source. The performance of a peer group of laboratories or the performance of a reference laboratory can be compared [1].

This EQA contains;

- 8 vials of inactivated or mock samples to be tested
- 3 vials of lyophilized primers and probes (lyoph-P&P)

These 11 vials should be stored at -20°C upon reception before being processed.

## MATERIALS NEEDED

### Samples

- 8 vials of inactivated or mock samples to be tested
- 3 vials of lyophilized primers and probes (lyoph-P&P)

### Buffers and Solutions

- Sterile distilled water or molecular grade water

### Equipment and Consumables

- Freezer (- 20°C)
- Thermal cycler
- Real-time thermal cycler
- Agarose gel electrophoresis and visualization system
- 1.5 ml Eppendorf tubes
- 0.2 ml PCR tubes and/or 96 well PCR plates
- Pencils, permanent pen
- Eppendorf and PCR tube storage boxes
- Micropipettes (0.1 – 1000 µl) and pipette tips
- Centrifuge
- Ice blocks / cold racks
- Commercial DNA extraction kits and commercial RNA extraction kits or commercial nucleic acid extraction kits
- PCR reagents (Taq polymerase, PCR master mix, primers, probes, molecular-grade water)
- Agarose, nucleic acid stain, nucleic acid loading dye, DNA ladder

## METHOD

### M1. Sample Processing

- Freeze-dried material, to be stored at -20°C upon reception before being processed.

### M2. Resuspension of EQA vials

All 8 vials must be reconstituted as indicated below. For each vial;

- Add **400µL** of sterile distilled water.

- Homogenize by pipetting: adjust the pipette 200µl and pipet 10 times.
- Incubation 10 minutes on the bench (room temperature).

### **M3. Nucleic Acid Extraction**

- Depending on the extraction protocol chosen by the partners, the extracted RNA or total nucleic acid, should be eluted in a volume ranging from 60 to 100 µL.

### **M4. Resuspension of Lyophilized Primers and Probes (Lyoph-P&P)**

Each tube contains lyoph-P&P for 24 reactions for three different detection systems: TOSV [2], SFSV [3] and PanPhlebo [4]. All 3 vials must be reconstituted as indicated below. For each vial;

- Add 182µl sterile distilled water.
- Homogenize by pipetting: adjust the pipette 100µl and pipet 10 times.
- Vortex the samples for about 5 seconds.
- Incubate  $\geq 10$  minutes on the bench (room temperature) before use (VERY IMPORTANT).

Attention: Lyoph-P&P should be resuspended immediately before PCR.

## M5. Conventional RT-PCR for Pan-Phlebovirus (Matsuno)

- Kit Recommendation: SuperScript™ One-Step RT-PCR System with Platinum (reference number: Thermo fisher 10928042)

| Reagent                                         | Volume | Volume 10x |
|-------------------------------------------------|--------|------------|
| Buffer (μL)                                     | 25     | 250        |
| Primers lyophilize (μL)<br>Pan-Phlebo (Matsuno) | 4      | 40         |
| Enzyme SSIII Platinum (μL)                      | 1      | 10         |
| H <sub>2</sub> O (μL)                           | 15     | 150        |

- If another kit is used, please adapt the volumes to the manufacturer's recommendations.

### Cycling

|      |         |           |
|------|---------|-----------|
| 50°C | 30 min  | 40 cycles |
| 94°C | 2 min   |           |
| 94°C | 30 sec  |           |
| 55°C | 1.5 min |           |
| 68°C | 30 sec  |           |
| 68°C | 7 min   |           |
| 20°C | 2 min   |           |

### Interpretation of results

- Products of RT-PCR amplification will be evaluated by electrophoresis in a 2.0% agarose gel. The observation of a ~500 nt band a priori reveals the presence of a phlebovirus genome. Please note that it is possible to have double bands for some phlebovirus strains (~500 nt and ~550nt).

## M6. Real-time RT-qPCR Molecular Consensus Assay Amplification of TOSV and SFSV

- Kit Recommendation: One-step qRT-PCR one-step Superscript III Platinum (reference number Thermo fisher 11732088) (for 500 reactions).

| Reagent                                    | Volume | Volume 10x |
|--------------------------------------------|--------|------------|
| Mix 2X PCR (μL)                            | 12.5   | 125        |
| Enzyme RT (μL)                             | 0.5    | 5          |
| P&P lyophilize (μL) (TOSV or SFSV primers) | 7      | 70         |
| Volume total (μL)                          | 20     | 200        |

- If another kit is used, please adapt the volumes to manufacturer's recommendations.

### Cycling

|      |        |           |
|------|--------|-----------|
| 50°C | 15 min | 45 cycles |
| 95°C | 2 min  |           |
| 95°C | 15 sec |           |
| 60°C | 45 sec |           |

### Interpretation of results

- The positive sample should have an amplification curve with a **cycle threshold value (Ct)**.

### Submission of results

Please send your results in an excel file provided by the/a reference laboratory.

You will need the following information to submit your results:

- Date receipt EQA panel and date analysis panel (if multiple days, date of RNA extraction)
- Storage conditions of the samples and condition of the panel (upon arrival)
- Detailed information on RNA or nucleic acid extraction process (incl. automated or manual process, exact name of the extraction system and/or the extraction kit)
- Reconstitution volume for samples of the panel, input volume used for RNA extraction, elution volume used for RNA extraction
- Detailed information on PCR method (incl. PCR kit name)
- Ct values and presence/absence of a gel band in targeted region for all samples.

## Contact

Please refer for additional information to the technical document provided with the panel or contact Nazli AYHAN, Ph.D ([nazliayhann@gmail.com](mailto:nazliayhann@gmail.com)).

## REFERENCES

1. Thirion L, et al. Lyophilized Matrix Containing Ready-to-Use Primers and Probe Solution for Standardization of Real-Time PCR and RT-qPCR Diagnostics in Virology. *Viruses*. 2020 Jan 30;12(2). pii: E159. doi: 10.3390/v12020159. PubMed PMID: 32019076.
2. Thirion, L., Pezzi, L., Pedrosa-Corral, I., Sanbonmatsu-Gamez, S., De Lamballerie, X., Falchi, A., Perez-Ruiz, M. and Charrel, R.N., 2021. Evaluation of a Trio Toscana Virus Real-Time RT-PCR Assay Targeting Three Genomic Regions within Nucleoprotein Gene. *Pathogens*, 10(3), p.254.
3. Alwassouf, S., Maia, C., Ayhan, N., Coimbra, M., Cristovao, J.M., Richet, H., Bichaud, L., Campino, L. and Charrel, R.N., 2016. Neutralization-based seroprevalence of Toscana virus and sandfly fever Sicilian virus in dogs and cats from Portugal. *Journal of General Virology*, 97(11), pp.2816-2823.
4. Matsuno, K., Weisend, C., Kajihara, M., Matysiak, C., Williamson, B.N., Simuunza, M., Mweene, A.S., Takada, A., Tesh, R.B. and Ebihara, H., 2015. Comprehensive molecular detection of tick-borne phleboviruses leads to the retrospective identification of taxonomically unassigned bunyaviruses and the discovery of a novel member of the genus phlebovirus. *Journal of virology*, 89(1), pp.594-604.

## DOCUMENT EDITING HISTORY

| Version<br>N° | Elaborated<br>by | Revised by | Approved<br>by | Editing date | Summary of changes |
|---------------|------------------|------------|----------------|--------------|--------------------|
| 0.1           | <Name>           | <Name>     | <Name>         | Yyyy/mm/dd   | <Text>             |
|               |                  |            |                |              |                    |
